# Supplementary material
Source: publisher figshare collection journal article supplement (https://acs.figshare.com/ndownloader/files/4655119)
Supplement: Supplementary file 1 [file 4655119]

 
data_shelxl 
 
_audit_creation_method            SHELXL-97 
_chemical_name_systematic 
; 
 ? 
; 
_chemical_name_common             ? 
_chemical_melting_point           ? 
_chemical_formula_moiety          ? 
_chemical_formula_sum 
 'C97 H109 Cl3 S8' 
_chemical_formula_weight          1637.67 
 
loop_ 
 _atom_type_symbol 
 _atom_type_description 
 _atom_type_scat_dispersion_real 
 _atom_type_scat_dispersion_imag 
 _atom_type_scat_source 
 'C'  'C'   0.0033   0.0016 
 'International Tables Vol C Tables 4.2.6.8 and 6.1.1.4' 
 'H'  'H'   0.0000   0.0000 
 'International Tables Vol C Tables 4.2.6.8 and 6.1.1.4' 
 'S'  'S'   0.1246   0.1234 
 'International Tables Vol C Tables 4.2.6.8 and 6.1.1.4' 
 'Cl'  'Cl'   0.1484   0.1585 
 'International Tables Vol C Tables 4.2.6.8 and 6.1.1.4' 
 
_symmetry_cell_setting            triclinic 
_symmetry_space_group_name_H-M    'P -1' 
 
loop_ 
 _symmetry_equiv_pos_as_xyz 
 'x, y, z' 
 '-x, -y, -z' 
 
_cell_length_a                    14.7182(9) 
_cell_length_b                    17.4492(10) 
_cell_length_c                    19.7488(13) 
_cell_angle_alpha                 75.644(9) 
_cell_angle_beta                  74.358(8) 
_cell_angle_gamma                 65.770(6) 
_cell_volume                      4399.0(5) 
_cell_formula_units_Z             2 
_cell_measurement_temperature     153(2) 
_cell_measurement_reflns_used     15678 
_cell_measurement_theta_min       1.5
_cell_measurement_theta_max       30.8 
 
_exptl_crystal_description        'prism' 
_exptl_crystal_colour             'red' 
_exptl_crystal_size_max           0.45 
_exptl_crystal_size_mid           0.10 
_exptl_crystal_size_min           0.10 
_exptl_crystal_density_meas       ? 
_exptl_crystal_density_diffrn     1.236 
_exptl_crystal_density_method     'not measured' 
_exptl_crystal_F_000              1740 
_exptl_absorpt_coefficient_mu     0.340 
_exptl_absorpt_correction_type    'Numerical'
_exptl_absorpt_correction_T_min   0.9314
_exptl_absorpt_correction_T_max   0.9848
_exptl_absorpt_process_details    ? 
 
_exptl_special_details 
; 
 ? 
; 
 
_diffrn_ambient_temperature       153(2) 
_diffrn_radiation_wavelength      0.71070 
_diffrn_radiation_type            MoK\a 
_diffrn_radiation_source          'fine-focus sealed tube' 
_diffrn_radiation_monochromator   graphite 
_diffrn_measurement_device_type   'Rigaku Saturn'
_diffrn_measurement_method        \w
_diffrn_detector_area_resol_mean  14.63 
_diffrn_reflns_number             44070
_diffrn_reflns_av_R_equivalents   0.0572 
_diffrn_reflns_av_sigmaI/netI     0.0916 
_diffrn_reflns_limit_h_min        -16 
_diffrn_reflns_limit_h_max        18 
_diffrn_reflns_limit_k_min        -14 
_diffrn_reflns_limit_k_max        21 
_diffrn_reflns_limit_l_min        -24 
_diffrn_reflns_limit_l_max        24 
_diffrn_reflns_theta_min          2.05 
_diffrn_reflns_theta_max          26.50 
_reflns_number_total              18046 
_reflns_number_gt                 13823 
_reflns_threshold_expression      >2sigma(I) 
 
_computing_data_collection        'CrystalClear (Rigaku/MSC Inc., 2005)'
_computing_cell_refinement        'CrystalClear (Rigaku/MSC Inc., 2005)'
_computing_data_reduction         'CrystalClear (Rigaku/MSC Inc., 2005)'
_computing_structure_solution     'SHELXS-97 (Sheldrick, 1990)' 
_computing_structure_refinement   'SHELXL-97 (Sheldrick, 1997)' 
_computing_molecular_graphics     'CrystalStructure 3.7.0'
_computing_publication_material   'CrystalStructure 3.7.0'
 
_refine_special_details 
; 
 Refinement of F^2^ against ALL reflections.  The weighted R-factor wR and 
 goodness of fit S are based on F^2^, conventional R-factors R are based 
 on F, with F set to zero for negative F^2^. The threshold expression of 
 F^2^ > 2sigma(F^2^) is used only for calculating R-factors(gt) etc. and is 
 not relevant to the choice of reflections for refinement.  R-factors based 
 on F^2^ are statistically about twice as large as those based on F, and R- 
 factors based on ALL data will be even larger. 
; 
 
_refine_ls_structure_factor_coef  Fsqd  
_refine_ls_matrix_type            full 
_refine_ls_weighting_scheme       calc  
_refine_ls_weighting_details 
 'calc w=1/[\s^2^(Fo^2^)+(0.0708P)^2^+6.3569P] where P=(Fo^2^+2Fc^2^)/3' 
_atom_sites_solution_primary      direct 
_atom_sites_solution_secondary    difmap 
_atom_sites_solution_hydrogens    geom 
_refine_ls_hydrogen_treatment     constr 
_refine_ls_extinction_method      none 
_refine_ls_extinction_coef        ? 
_refine_ls_number_reflns          18046 
_refine_ls_number_parameters      974 
_refine_ls_number_restraints      0 
_refine_ls_R_factor_all           0.1345 
_refine_ls_R_factor_gt            0.1061 
_refine_ls_wR_factor_ref          0.2463 
_refine_ls_wR_factor_gt           0.2256 
_refine_ls_goodness_of_fit_ref    1.151 
_refine_ls_restrained_S_all       1.151 
_refine_ls_shift/su_max           0.001 
_refine_ls_shift/su_mean          0.000 
 
loop_ 
 _atom_site_label 
 _atom_site_type_symbol 
 _atom_site_fract_x 
 _atom_site_fract_y 
 _atom_site_fract_z 
 _atom_site_U_iso_or_equiv 
 _atom_site_adp_type 
 _atom_site_occupancy 
 _atom_site_symmetry_multiplicity 
 _atom_site_calc_flag 
 _atom_site_refinement_flags 
 _atom_site_disorder_assembly 
 _atom_site_disorder_group 
Cl1 Cl 0.0692(3) 0.1457(2) 0.95167(18) 0.1935(17) Uani 1 1 d . . . 
Cl2 Cl 0.0207(3) 0.0486(3) 1.08020(18) 0.213(2) Uani 1 1 d . . . 
Cl3 Cl 0.1245(4) 0.1521(3) 1.0773(4) 0.294(3) Uani 1 1 d . . . 
S1 S 0.31879(11) 0.88235(9) 1.03090(6) 0.0481(3) Uani 1 1 d . . . 
S2 S 0.57223(11) 0.79522(8) 1.02980(6) 0.0472(3) Uani 1 1 d . . . 
S3 S 0.36516(9) 1.01971(8) 0.92138(6) 0.0379(3) Uani 1 1 d . . . 
S4 S 0.58308(9) 0.94286(7) 0.91573(6) 0.0367(3) Uani 1 1 d . . . 
S5 S 1.00651(9) 0.45525(8) 0.68494(6) 0.0397(3) Uani 1 1 d . . . 
S6 S 1.03882(10) 0.53000(8) 0.78905(7) 0.0450(3) Uani 1 1 d . . . 
S7 S 1.02463(10) 0.59608(9) 0.56482(7) 0.0493(3) Uani 1 1 d . . . 
S8 S 1.04646(11) 0.68775(9) 0.68971(8) 0.0560(4) Uani 1 1 d . . . 
C1 C 0.3775(6) 0.4454(5) 0.5655(4) 0.086(2) Uani 1 1 d . . . 
H1 H 0.3919 0.4741 0.5168 0.103 Uiso 1 1 calc R . . 
H2 H 0.3401 0.4097 0.5665 0.103 Uiso 1 1 calc R . . 
H3 H 0.4415 0.4097 0.5818 0.103 Uiso 1 1 calc R . . 
C2 C 0.3144(5) 0.5110(4) 0.6140(3) 0.0654(16) Uani 1 1 d . . . 
H4 H 0.2694 0.4878 0.6527 0.079 Uiso 1 1 calc R . . 
H5 H 0.2707 0.5622 0.5865 0.079 Uiso 1 1 calc R . . 
C3 C 0.3781(4) 0.5370(3) 0.6466(3) 0.0475(12) Uani 1 1 d . . . 
H6 H 0.4233 0.4859 0.6730 0.057 Uiso 1 1 calc R . . 
H7 H 0.4212 0.5624 0.6082 0.057 Uiso 1 1 calc R . . 
C4 C 0.3119(4) 0.6007(3) 0.6968(2) 0.0457(12) Uani 1 1 d . . . 
H8 H 0.2633 0.5774 0.7314 0.055 Uiso 1 1 calc R . . 
H9 H 0.2719 0.6536 0.6688 0.055 Uiso 1 1 calc R . . 
C5 C 0.3692(4) 0.6236(3) 0.7383(2) 0.0449(12) Uani 1 1 d . . . 
H10 H 0.4078 0.5714 0.7677 0.054 Uiso 1 1 calc R . . 
H11 H 0.4183 0.6466 0.7042 0.054 Uiso 1 1 calc R . . 
C6 C 0.2974(4) 0.6889(3) 0.7863(2) 0.0464(12) Uani 1 1 d . . . 
H12 H 0.2458 0.6670 0.8180 0.056 Uiso 1 1 calc R . . 
H13 H 0.2615 0.7419 0.7563 0.056 Uiso 1 1 calc R . . 
C7 C 0.3503(4) 0.7101(3) 0.8317(3) 0.0494(13) Uani 1 1 d . . . 
H14 H 0.4026 0.7312 0.8001 0.059 Uiso 1 1 calc R . . 
H15 H 0.3851 0.6574 0.8624 0.059 Uiso 1 1 calc R . . 
C8 C 0.2777(4) 0.7768(3) 0.8787(2) 0.0459(12) Uani 1 1 d . . . 
H16 H 0.2437 0.8299 0.8480 0.055 Uiso 1 1 calc R . . 
H17 H 0.2247 0.7561 0.9099 0.055 Uiso 1 1 calc R . . 
C9 C 0.3309(4) 0.7963(3) 0.9246(2) 0.0464(12) Uani 1 1 d . . . 
H18 H 0.3600 0.7442 0.9581 0.056 Uiso 1 1 calc R . . 
H19 H 0.3877 0.8122 0.8938 0.056 Uiso 1 1 calc R . . 
C10 C 0.2613(4) 0.8671(3) 0.9667(2) 0.0464(12) Uani 1 1 d . . . 
H20 H 0.1999 0.8548 0.9923 0.056 Uiso 1 1 calc R . . 
H21 H 0.2397 0.9208 0.9331 0.056 Uiso 1 1 calc R . . 
C11 C 0.6973(7) 0.3242(6) 0.5772(5) 0.110(3) Uani 1 1 d . . . 
H22 H 0.6816 0.2772 0.6102 0.132 Uiso 1 1 calc R . . 
H23 H 0.7411 0.3038 0.5332 0.132 Uiso 1 1 calc R . . 
H24 H 0.6343 0.3699 0.5662 0.132 Uiso 1 1 calc R . . 
C12 C 0.7507(6) 0.3572(5) 0.6107(4) 0.084(2) Uani 1 1 d . . . 
H25 H 0.7984 0.3783 0.5728 0.100 Uiso 1 1 calc R . . 
H26 H 0.7913 0.3095 0.6426 0.100 Uiso 1 1 calc R . . 
C13 C 0.6803(4) 0.4282(3) 0.6532(3) 0.0494(13) Uani 1 1 d . . . 
H27 H 0.6272 0.4097 0.6870 0.059 Uiso 1 1 calc R . . 
H28 H 0.6462 0.4786 0.6202 0.059 Uiso 1 1 calc R . . 
C14 C 0.7338(4) 0.4541(3) 0.6947(3) 0.0487(12) Uani 1 1 d . . . 
H29 H 0.7701 0.4033 0.7264 0.058 Uiso 1 1 calc R . . 
H30 H 0.7852 0.4747 0.6607 0.058 Uiso 1 1 calc R . . 
C15 C 0.6635(4) 0.5225(3) 0.7391(2) 0.0433(11) Uani 1 1 d . . . 
H31 H 0.6113 0.5025 0.7724 0.052 Uiso 1 1 calc R . . 
H32 H 0.6284 0.5738 0.7073 0.052 Uiso 1 1 calc R . . 
C16 C 0.7167(4) 0.5471(3) 0.7817(2) 0.0434(11) Uani 1 1 d . . . 
H33 H 0.7625 0.5742 0.7483 0.052 Uiso 1 1 calc R . . 
H34 H 0.7590 0.4948 0.8090 0.052 Uiso 1 1 calc R . . 
C17 C 0.6438(4) 0.6077(3) 0.8332(3) 0.0468(12) Uani 1 1 d . . . 
H35 H 0.5988 0.5801 0.8669 0.056 Uiso 1 1 calc R . . 
H36 H 0.6006 0.6593 0.8059 0.056 Uiso 1 1 calc R . . 
C18 C 0.6952(4) 0.6345(3) 0.8757(2) 0.0445(12) Uani 1 1 d . . . 
H37 H 0.7362 0.5835 0.9049 0.053 Uiso 1 1 calc R . . 
H38 H 0.7416 0.6610 0.8425 0.053 Uiso 1 1 calc R . . 
C19 C 0.6181(4) 0.6971(3) 0.9241(2) 0.0460(12) Uani 1 1 d . . . 
H39 H 0.5769 0.7476 0.8946 0.055 Uiso 1 1 calc R . . 
H40 H 0.5717 0.6702 0.9570 0.055 Uiso 1 1 calc R . . 
C20 C 0.6653(4) 0.7261(3) 0.9675(3) 0.0453(12) Uani 1 1 d . . . 
H41 H 0.7077 0.7568 0.9347 0.054 Uiso 1 1 calc R . . 
H42 H 0.7104 0.6755 0.9944 0.054 Uiso 1 1 calc R . . 
C21 C 0.4106(4) 0.9200(3) 0.9738(2) 0.0381(11) Uani 1 1 d . . . 
C22 C 0.5112(4) 0.8847(3) 0.9726(2) 0.0390(11) Uani 1 1 d . . . 
C23 C 0.4844(3) 1.0233(3) 0.8754(2) 0.0328(9) Uani 1 1 d . . . 
C24 C 0.4979(3) 1.0779(3) 0.8145(2) 0.0306(9) Uani 1 1 d . . . 
C25 C 0.4107(3) 1.1434(3) 0.7836(2) 0.0309(9) Uani 1 1 d . . . 
C26 C 0.3197(3) 1.1891(3) 0.8240(2) 0.0333(10) Uani 1 1 d . . . 
H43 H 0.3103 1.1770 0.8745 0.040 Uiso 1 1 calc R . . 
C27 C 0.2428(4) 1.2519(3) 0.7922(2) 0.0398(11) Uani 1 1 d . . . 
H44 H 0.1800 1.2803 0.8208 0.048 Uiso 1 1 calc R . . 
C28 C 0.2566(4) 1.2737(3) 0.7189(2) 0.0411(11) Uani 1 1 d . . . 
H45 H 0.2048 1.3190 0.6972 0.049 Uiso 1 1 calc R . . 
C29 C 0.3464(4) 1.2290(3) 0.6774(2) 0.0368(10) Uani 1 1 d . . . 
H46 H 0.3560 1.2437 0.6270 0.044 Uiso 1 1 calc R . . 
C30 C 0.4237(3) 1.1621(3) 0.7087(2) 0.0284(9) Uani 1 1 d . . . 
C31 C 0.5176(3) 1.1099(3) 0.6664(2) 0.0317(9) Uani 1 1 d . . . 
C32 C 0.6091(3) 1.0859(3) 0.6965(2) 0.0309(9) Uani 1 1 d . . . 
C33 C 0.7046(3) 1.0784(3) 0.6541(2) 0.0392(11) Uani 1 1 d . . . 
H47 H 0.7121 1.0883 0.6037 0.047 Uiso 1 1 calc R . . 
C34 C 0.7877(4) 1.0571(3) 0.6839(3) 0.0444(12) Uani 1 1 d . . . 
H48 H 0.8520 1.0517 0.6543 0.053 Uiso 1 1 calc R . . 
C35 C 0.7770(4) 1.0437(3) 0.7572(3) 0.0428(11) Uani 1 1 d . . . 
H49 H 0.8342 1.0289 0.7781 0.051 Uiso 1 1 calc R . . 
C36 C 0.6826(4) 1.0518(3) 0.8004(2) 0.0370(10) Uani 1 1 d . . . 
H50 H 0.6758 1.0432 0.8506 0.044 Uiso 1 1 calc R . . 
C37 C 0.5985(3) 1.0722(3) 0.7711(2) 0.0303(9) Uani 1 1 d . . . 
C38 C 0.5170(3) 1.0791(3) 0.6090(2) 0.0306(9) Uani 1 1 d . . . 
C39 C 0.4242(3) 1.0971(3) 0.5867(2) 0.0330(10) Uani 1 1 d . . . 
C40 C 0.6046(3) 1.0208(3) 0.5707(2) 0.0332(10) Uani 1 1 d . . . 
C41 C 0.6718(3) 0.9700(3) 0.5374(2) 0.0329(9) Uani 1 1 d . . . 
C42 C 0.7586(3) 0.9084(3) 0.5007(2) 0.0331(9) Uani 1 1 d . . . 
C43 C 0.8534(4) 0.8849(3) 0.5175(2) 0.0413(11) Uani 1 1 d . . . 
H51 H 0.8598 0.9102 0.5526 0.050 Uiso 1 1 calc R . . 
C44 C 0.9385(4) 0.8254(3) 0.4839(3) 0.0435(11) Uani 1 1 d . . . 
H52 H 1.0028 0.8094 0.4961 0.052 Uiso 1 1 calc R . . 
C45 C 0.9291(4) 0.7892(3) 0.4323(2) 0.0441(12) Uani 1 1 d . . . 
H53 H 0.9873 0.7488 0.4086 0.053 Uiso 1 1 calc R . . 
C46 C 0.8356(3) 0.8116(3) 0.4150(2) 0.0391(11) Uani 1 1 d . . . 
H54 H 0.8302 0.7861 0.3797 0.047 Uiso 1 1 calc R . . 
C47 C 0.7490(3) 0.8710(3) 0.4487(2) 0.0324(9) Uani 1 1 d . . . 
C48 C 0.6525(3) 0.8919(3) 0.4313(2) 0.0313(9) Uani 1 1 d . . . 
C49 C 0.0543(4) 0.9182(4) 0.5843(3) 0.0705(18) Uani 1 1 d . . . 
H55 H 0.0242 0.8883 0.6275 0.085 Uiso 1 1 calc R . . 
H56 H 0.0081 0.9421 0.5504 0.085 Uiso 1 1 calc R . . 
H57 H 0.0657 0.9642 0.5966 0.085 Uiso 1 1 calc R . . 
C50 C 0.1545(4) 0.8563(4) 0.5511(3) 0.0533(14) Uani 1 1 d . . . 
H58 H 0.1510 0.7990 0.5612 0.064 Uiso 1 1 calc R . . 
H59 H 0.1656 0.8739 0.4989 0.064 Uiso 1 1 calc R . . 
C51 C 0.2437(4) 0.8514(3) 0.5784(2) 0.0439(11) Uani 1 1 d . . . 
H60 H 0.2312 0.8350 0.6308 0.053 Uiso 1 1 calc R . . 
H61 H 0.2469 0.9088 0.5679 0.053 Uiso 1 1 calc R . . 
C52 C 0.3456(4) 0.7896(3) 0.5478(2) 0.0418(11) Uani 1 1 d . . . 
H62 H 0.3582 0.8052 0.4953 0.050 Uiso 1 1 calc R . . 
H63 H 0.3435 0.7318 0.5592 0.050 Uiso 1 1 calc R . . 
C53 C 0.4335(4) 0.7881(3) 0.5758(2) 0.0403(11) Uani 1 1 d . . . 
H64 H 0.4385 0.8450 0.5616 0.048 Uiso 1 1 calc R . . 
H65 H 0.4187 0.7764 0.6285 0.048 Uiso 1 1 calc R . . 
C54 C 0.5347(4) 0.7223(3) 0.5489(2) 0.0387(11) Uani 1 1 d . . . 
H66 H 0.5491 0.7336 0.4963 0.046 Uiso 1 1 calc R . . 
H67 H 0.5299 0.6653 0.5635 0.046 Uiso 1 1 calc R . . 
C55 C 0.6229(4) 0.7209(3) 0.5762(2) 0.0381(10) Uani 1 1 d . . . 
H68 H 0.6262 0.7784 0.5631 0.046 Uiso 1 1 calc R . . 
H69 H 0.6096 0.7075 0.6288 0.046 Uiso 1 1 calc R . . 
C56 C 0.7253(4) 0.6569(3) 0.5472(2) 0.0411(11) Uani 1 1 d . . . 
H70 H 0.7219 0.5994 0.5599 0.049 Uiso 1 1 calc R . . 
H71 H 0.7391 0.6706 0.4946 0.049 Uiso 1 1 calc R . . 
C57 C 0.8128(4) 0.6552(3) 0.5752(2) 0.0387(11) Uani 1 1 d . . . 
H72 H 0.8004 0.6399 0.6277 0.046 Uiso 1 1 calc R . . 
H73 H 0.8159 0.7127 0.5633 0.046 Uiso 1 1 calc R . . 
C58 C 0.9138(4) 0.5919(3) 0.5438(2) 0.0442(12) Uani 1 1 d . . . 
H74 H 0.9206 0.6022 0.4914 0.053 Uiso 1 1 calc R . . 
H75 H 0.9131 0.5338 0.5613 0.053 Uiso 1 1 calc R . . 
C59 C 0.0773(4) 1.0099(4) 0.7299(4) 0.0682(17) Uani 1 1 d . . . 
H76 H 0.0606 1.0537 0.6884 0.082 Uiso 1 1 calc R . . 
H77 H 0.0177 1.0194 0.7685 0.082 Uiso 1 1 calc R . . 
H78 H 0.0975 0.9536 0.7170 0.082 Uiso 1 1 calc R . . 
C60 C 0.1646(4) 1.0143(4) 0.7545(3) 0.0525(13) Uani 1 1 d . . . 
H79 H 0.1605 1.0740 0.7440 0.063 Uiso 1 1 calc R . . 
H80 H 0.1571 0.9965 0.8068 0.063 Uiso 1 1 calc R . . 
C61 C 0.2686(4) 0.9582(3) 0.7188(2) 0.0433(11) Uani 1 1 d . . . 
H81 H 0.2704 0.8995 0.7260 0.052 Uiso 1 1 calc R . . 
H82 H 0.2780 0.9791 0.6670 0.052 Uiso 1 1 calc R . . 
C62 C 0.3552(4) 0.9565(3) 0.7466(2) 0.0415(11) Uani 1 1 d . . . 
H83 H 0.3430 0.9399 0.7990 0.050 Uiso 1 1 calc R . . 
H84 H 0.3566 1.0145 0.7360 0.050 Uiso 1 1 calc R . . 
C63 C 0.4589(4) 0.8951(3) 0.7149(2) 0.0398(11) Uani 1 1 d . . . 
H85 H 0.4557 0.8380 0.7220 0.048 Uiso 1 1 calc R . . 
H86 H 0.4734 0.9143 0.6629 0.048 Uiso 1 1 calc R . . 
C64 C 0.5458(4) 0.8877(3) 0.7468(2) 0.0401(11) Uani 1 1 d . . . 
H87 H 0.5486 0.9449 0.7400 0.048 Uiso 1 1 calc R . . 
H88 H 0.5317 0.8679 0.7986 0.048 Uiso 1 1 calc R . . 
C65 C 0.6482(4) 0.8278(3) 0.7149(2) 0.0406(11) Uani 1 1 d . . . 
H89 H 0.6470 0.7697 0.7250 0.049 Uiso 1 1 calc R . . 
H90 H 0.6599 0.8449 0.6626 0.049 Uiso 1 1 calc R . . 
C66 C 0.7358(4) 0.8253(3) 0.7423(2) 0.0439(11) Uani 1 1 d . . . 
H91 H 0.7243 0.8088 0.7947 0.053 Uiso 1 1 calc R . . 
H92 H 0.7386 0.8829 0.7313 0.053 Uiso 1 1 calc R . . 
C67 C 0.8372(4) 0.7626(3) 0.7094(3) 0.0443(12) Uani 1 1 d . . . 
H93 H 0.8318 0.7062 0.7174 0.053 Uiso 1 1 calc R . . 
H94 H 0.8499 0.7816 0.6574 0.053 Uiso 1 1 calc R . . 
C68 C 0.9267(4) 0.7528(3) 0.7384(3) 0.0500(13) Uani 1 1 d . . . 
H95 H 0.9188 0.7264 0.7891 0.060 Uiso 1 1 calc R . . 
H96 H 0.9278 0.8097 0.7359 0.060 Uiso 1 1 calc R . . 
C69 C 1.0163(3) 0.5559(3) 0.6558(2) 0.0413(11) Uani 1 1 d . . . 
C70 C 1.0290(4) 0.5908(3) 0.7040(3) 0.0425(11) Uani 1 1 d . . . 
C71 C 1.0038(3) 0.4496(3) 0.7763(2) 0.0354(10) Uani 1 1 d . . . 
C72 C 0.9769(3) 0.3934(3) 0.8297(2) 0.0352(10) Uani 1 1 d . . . 
C73 C 0.9382(3) 0.3322(3) 0.8191(2) 0.0342(10) Uani 1 1 d . . . 
C74 C 0.9799(4) 0.2856(3) 0.7632(2) 0.0400(11) Uani 1 1 d . . . 
H97 H 1.0365 0.2926 0.7291 0.048 Uiso 1 1 calc R . . 
C75 C 0.9402(4) 0.2294(3) 0.7567(3) 0.0474(12) Uani 1 1 d . . . 
H98 H 0.9694 0.1983 0.7179 0.057 Uiso 1 1 calc R . . 
C76 C 0.8580(4) 0.2177(3) 0.8060(3) 0.0477(12) Uani 1 1 d . . . 
H99 H 0.8309 0.1788 0.8013 0.057 Uiso 1 1 calc R . . 
C77 C 0.8162(4) 0.2631(3) 0.8620(2) 0.0422(11) Uani 1 1 d . . . 
H100 H 0.7597 0.2553 0.8957 0.051 Uiso 1 1 calc R . . 
C78 C 0.8546(3) 0.3201(3) 0.8704(2) 0.0366(10) Uani 1 1 d . . . 
C79 C 0.8143(3) 0.3678(3) 0.9305(2) 0.0353(10) Uani 1 1 d . . . 
C80 C 0.8921(3) 0.3796(3) 0.9564(2) 0.0367(10) Uani 1 1 d . . . 
C81 C 0.8910(4) 0.3739(3) 1.0278(2) 0.0433(11) Uani 1 1 d . . . 
H101 H 0.8361 0.3645 1.0624 0.052 Uiso 1 1 calc R . . 
C82 C 0.9670(4) 0.3816(3) 1.0497(3) 0.0501(13) Uani 1 1 d . . . 
H102 H 0.9650 0.3770 1.0990 0.060 Uiso 1 1 calc R . . 
C83 C 1.0473(4) 0.3961(3) 0.9993(3) 0.0499(13) Uani 1 1 d . . . 
H103 H 1.0994 0.4030 1.0141 0.060 Uiso 1 1 calc R . . 
C84 C 1.0511(4) 0.4004(3) 0.9279(3) 0.0422(11) Uani 1 1 d . . . 
H104 H 1.1070 0.4088 0.8939 0.051 Uiso 1 1 calc R . . 
C85 C 0.9746(3) 0.3926(3) 0.9052(2) 0.0360(10) Uani 1 1 d . . . 
C86 C 0.7121(4) 0.4037(3) 0.9576(2) 0.0374(10) Uani 1 1 d . . . 
C87 C 0.6740(3) 0.4567(3) 1.0117(2) 0.0389(11) Uani 1 1 d . . . 
C88 C 0.6362(4) 0.3974(3) 0.9294(2) 0.0367(10) Uani 1 1 d . . . 
C89 C 0.5705(4) 0.3957(3) 0.9057(2) 0.0379(11) Uani 1 1 d . . . 
C90 C 0.4963(4) 0.3917(3) 0.8741(2) 0.0390(11) Uani 1 1 d . . . 
C91 C 0.5259(5) 0.3390(3) 0.8226(2) 0.0492(13) Uani 1 1 d . . . 
H105 H 0.5954 0.3049 0.8092 0.059 Uiso 1 1 calc R . . 
C92 C 0.4528(6) 0.3369(4) 0.7912(3) 0.0616(17) Uani 1 1 d . . . 
H106 H 0.4728 0.3006 0.7568 0.074 Uiso 1 1 calc R . . 
C93 C 0.3523(5) 0.3867(4) 0.8095(3) 0.0601(16) Uani 1 1 d . . . 
H107 H 0.3034 0.3856 0.7870 0.072 Uiso 1 1 calc R . . 
C94 C 0.3225(4) 0.4379(4) 0.8599(2) 0.0480(13) Uani 1 1 d . . . 
H108 H 0.2527 0.4716 0.8725 0.058 Uiso 1 1 calc R . . 
C95 C 0.3930(4) 0.4416(3) 0.8932(2) 0.0392(11) Uani 1 1 d . . . 
C96 C 0.3591(4) 0.4964(3) 0.9454(2) 0.0395(11) Uani 1 1 d . . . 
C97 C 0.0976(9) 0.0991(8) 1.0319(5) 0.138(4) Uani 1 1 d . . . 
H109 H 0.1638 0.0514 1.0207 0.166 Uiso 1 1 calc R . . 
 
loop_ 
 _atom_site_aniso_label 
 _atom_site_aniso_U_11 
 _atom_site_aniso_U_22 
 _atom_site_aniso_U_33 
 _atom_site_aniso_U_23 
 _atom_site_aniso_U_13 
 _atom_site_aniso_U_12 
Cl1 0.155(3) 0.173(3) 0.161(3) 0.069(2) -0.042(2) -0.017(2) 
Cl2 0.136(3) 0.350(6) 0.152(3) 0.046(3) -0.014(2) -0.144(4) 
Cl3 0.325(6) 0.132(3) 0.502(9) -0.099(4) -0.255(7) -0.022(4) 
S1 0.0699(9) 0.0552(8) 0.0311(6) 0.0005(5) -0.0116(5) -0.0377(7) 
S2 0.0706(9) 0.0357(7) 0.0357(6) 0.0013(5) -0.0219(6) -0.0166(6) 
S3 0.0433(7) 0.0397(7) 0.0315(5) -0.0025(5) -0.0092(5) -0.0166(5) 
S4 0.0441(7) 0.0346(6) 0.0333(5) -0.0015(4) -0.0156(5) -0.0133(5) 
S5 0.0367(6) 0.0379(7) 0.0393(6) -0.0024(5) -0.0082(5) -0.0102(5) 
S6 0.0458(7) 0.0465(7) 0.0470(7) -0.0021(5) -0.0124(5) -0.0221(6) 
S7 0.0390(7) 0.0540(8) 0.0458(7) 0.0061(6) -0.0078(5) -0.0162(6) 
S8 0.0456(8) 0.0457(8) 0.0774(9) 0.0007(7) -0.0102(7) -0.0241(7) 
C1 0.100(6) 0.086(5) 0.084(5) -0.039(4) -0.017(4) -0.034(5) 
C2 0.070(4) 0.074(4) 0.062(4) -0.027(3) -0.012(3) -0.028(3) 
C3 0.046(3) 0.044(3) 0.052(3) -0.011(2) -0.010(2) -0.014(2) 
C4 0.052(3) 0.045(3) 0.040(3) -0.004(2) -0.008(2) -0.020(3) 
C5 0.052(3) 0.046(3) 0.041(3) 0.000(2) -0.013(2) -0.023(2) 
C6 0.058(3) 0.052(3) 0.031(2) 0.000(2) -0.011(2) -0.025(3) 
C7 0.065(4) 0.051(3) 0.044(3) 0.003(2) -0.018(2) -0.034(3) 
C8 0.062(3) 0.049(3) 0.040(3) 0.005(2) -0.018(2) -0.035(3) 
C9 0.067(4) 0.045(3) 0.040(3) 0.000(2) -0.021(2) -0.029(3) 
C10 0.057(3) 0.049(3) 0.043(3) 0.004(2) -0.019(2) -0.028(3) 
C11 0.134(8) 0.102(7) 0.118(7) -0.049(5) -0.049(6) -0.032(6) 
C12 0.084(5) 0.103(6) 0.074(4) -0.041(4) -0.015(4) -0.029(4) 
C13 0.056(3) 0.055(3) 0.040(3) -0.007(2) -0.009(2) -0.024(3) 
C14 0.043(3) 0.053(3) 0.049(3) -0.007(2) -0.007(2) -0.017(3) 
C15 0.046(3) 0.040(3) 0.041(2) -0.005(2) -0.007(2) -0.015(2) 
C16 0.043(3) 0.041(3) 0.042(3) -0.005(2) -0.007(2) -0.014(2) 
C17 0.046(3) 0.039(3) 0.050(3) -0.005(2) -0.008(2) -0.012(2) 
C18 0.048(3) 0.039(3) 0.045(3) -0.002(2) -0.009(2) -0.017(2) 
C19 0.059(3) 0.034(3) 0.042(3) -0.005(2) -0.012(2) -0.013(2) 
C20 0.051(3) 0.033(3) 0.051(3) -0.004(2) -0.018(2) -0.011(2) 
C21 0.061(3) 0.038(3) 0.023(2) -0.0056(18) -0.0103(19) -0.023(2) 
C22 0.055(3) 0.034(3) 0.030(2) -0.0072(18) -0.013(2) -0.015(2) 
C23 0.044(3) 0.028(2) 0.030(2) -0.0072(17) -0.0140(18) -0.011(2) 
C24 0.034(2) 0.030(2) 0.029(2) -0.0067(17) -0.0111(17) -0.0094(19) 
C25 0.038(2) 0.025(2) 0.032(2) -0.0043(17) -0.0108(18) -0.0117(19) 
C26 0.045(3) 0.029(2) 0.028(2) -0.0072(17) -0.0093(18) -0.013(2) 
C27 0.041(3) 0.033(2) 0.044(3) -0.010(2) -0.011(2) -0.008(2) 
C28 0.042(3) 0.033(3) 0.047(3) -0.006(2) -0.018(2) -0.007(2) 
C29 0.043(3) 0.033(2) 0.035(2) -0.0048(18) -0.0113(19) -0.013(2) 
C30 0.031(2) 0.027(2) 0.028(2) -0.0024(16) -0.0096(16) -0.0103(18) 
C31 0.036(2) 0.031(2) 0.029(2) 0.0008(17) -0.0094(17) -0.0138(19) 
C32 0.037(2) 0.029(2) 0.032(2) -0.0013(17) -0.0125(17) -0.0163(19) 
C33 0.038(3) 0.043(3) 0.038(2) -0.003(2) -0.0063(19) -0.020(2) 
C34 0.035(3) 0.052(3) 0.052(3) -0.013(2) -0.008(2) -0.018(2) 
C35 0.041(3) 0.044(3) 0.053(3) -0.004(2) -0.020(2) -0.020(2) 
C36 0.043(3) 0.039(3) 0.036(2) -0.0070(19) -0.0147(19) -0.017(2) 
C37 0.037(2) 0.023(2) 0.032(2) -0.0005(16) -0.0115(17) -0.0118(18) 
C38 0.036(2) 0.029(2) 0.027(2) 0.0001(16) -0.0099(17) -0.0113(19) 
C39 0.040(3) 0.032(2) 0.026(2) -0.0050(17) -0.0082(18) -0.010(2) 
C40 0.036(2) 0.036(2) 0.029(2) 0.0019(18) -0.0109(18) -0.015(2) 
C41 0.036(2) 0.035(2) 0.031(2) -0.0023(18) -0.0133(18) -0.014(2) 
C42 0.032(2) 0.035(2) 0.031(2) -0.0004(17) -0.0091(17) -0.0121(19) 
C43 0.039(3) 0.044(3) 0.042(2) -0.009(2) -0.013(2) -0.012(2) 
C44 0.031(3) 0.050(3) 0.051(3) -0.004(2) -0.010(2) -0.018(2) 
C45 0.035(3) 0.048(3) 0.038(2) -0.005(2) -0.0072(19) -0.005(2) 
C46 0.037(3) 0.042(3) 0.034(2) -0.006(2) -0.0049(19) -0.012(2) 
C47 0.037(2) 0.036(2) 0.0237(19) 0.0015(17) -0.0071(17) -0.015(2) 
C48 0.037(2) 0.029(2) 0.026(2) -0.0048(16) -0.0052(17) -0.0101(19) 
C49 0.038(3) 0.100(5) 0.086(4) -0.038(4) -0.008(3) -0.027(3) 
C50 0.038(3) 0.075(4) 0.055(3) -0.014(3) -0.006(2) -0.028(3) 
C51 0.042(3) 0.050(3) 0.043(3) -0.003(2) -0.011(2) -0.020(2) 
C52 0.047(3) 0.047(3) 0.039(2) -0.002(2) -0.011(2) -0.025(2) 
C53 0.050(3) 0.038(3) 0.036(2) 0.0020(19) -0.015(2) -0.020(2) 
C54 0.044(3) 0.041(3) 0.033(2) -0.0037(19) -0.0108(19) -0.016(2) 
C55 0.048(3) 0.036(3) 0.033(2) 0.0000(19) -0.0126(19) -0.018(2) 
C56 0.044(3) 0.039(3) 0.038(2) -0.004(2) -0.013(2) -0.011(2) 
C57 0.046(3) 0.041(3) 0.030(2) 0.0004(19) -0.0125(19) -0.018(2) 
C58 0.044(3) 0.044(3) 0.039(2) -0.004(2) -0.012(2) -0.010(2) 
C59 0.049(4) 0.058(4) 0.102(5) -0.021(3) -0.020(3) -0.017(3) 
C60 0.047(3) 0.049(3) 0.060(3) -0.008(3) -0.012(2) -0.017(3) 
C61 0.056(3) 0.042(3) 0.037(2) 0.001(2) -0.013(2) -0.024(2) 
C62 0.051(3) 0.041(3) 0.035(2) -0.004(2) -0.010(2) -0.019(2) 
C63 0.051(3) 0.037(3) 0.036(2) -0.0034(19) -0.010(2) -0.021(2) 
C64 0.050(3) 0.037(3) 0.039(2) -0.007(2) -0.013(2) -0.018(2) 
C65 0.054(3) 0.034(3) 0.037(2) -0.0050(19) -0.012(2) -0.017(2) 
C66 0.051(3) 0.039(3) 0.043(3) -0.003(2) -0.015(2) -0.016(2) 
C67 0.045(3) 0.045(3) 0.044(3) -0.009(2) -0.007(2) -0.016(2) 
C68 0.050(3) 0.040(3) 0.064(3) -0.006(2) -0.019(3) -0.017(2) 
C69 0.028(2) 0.041(3) 0.047(3) 0.003(2) -0.0071(19) -0.011(2) 
C70 0.032(3) 0.043(3) 0.049(3) -0.001(2) -0.009(2) -0.013(2) 
C71 0.026(2) 0.036(3) 0.039(2) -0.0044(19) -0.0080(17) -0.0057(19) 
C72 0.028(2) 0.034(2) 0.037(2) -0.0016(18) -0.0066(18) -0.0072(19) 
C73 0.036(2) 0.030(2) 0.033(2) -0.0042(18) -0.0110(18) -0.0062(19) 
C74 0.041(3) 0.031(2) 0.042(2) -0.0055(19) -0.003(2) -0.011(2) 
C75 0.059(3) 0.036(3) 0.044(3) -0.013(2) -0.002(2) -0.016(2) 
C76 0.056(3) 0.038(3) 0.050(3) -0.005(2) -0.009(2) -0.021(3) 
C77 0.048(3) 0.035(3) 0.043(3) -0.005(2) -0.008(2) -0.015(2) 
C78 0.036(3) 0.031(2) 0.034(2) -0.0024(18) -0.0076(18) -0.004(2) 
C79 0.038(3) 0.035(2) 0.031(2) 0.0025(18) -0.0068(18) -0.015(2) 
C80 0.039(3) 0.030(2) 0.038(2) -0.0049(18) -0.0093(19) -0.008(2) 
C81 0.045(3) 0.043(3) 0.038(2) 0.000(2) -0.011(2) -0.014(2) 
C82 0.058(3) 0.044(3) 0.046(3) -0.007(2) -0.021(2) -0.009(3) 
C83 0.045(3) 0.053(3) 0.056(3) -0.004(2) -0.025(2) -0.016(3) 
C84 0.034(3) 0.041(3) 0.050(3) -0.004(2) -0.012(2) -0.011(2) 
C85 0.035(2) 0.034(2) 0.036(2) -0.0008(18) -0.0127(18) -0.008(2) 
C86 0.038(3) 0.039(3) 0.033(2) 0.0015(19) -0.0054(18) -0.016(2) 
C87 0.034(3) 0.049(3) 0.033(2) -0.002(2) -0.0021(18) -0.020(2) 
C88 0.039(3) 0.037(3) 0.031(2) -0.0006(18) -0.0034(19) -0.015(2) 
C89 0.045(3) 0.039(3) 0.030(2) -0.0070(19) 0.0034(19) -0.020(2) 
C90 0.054(3) 0.042(3) 0.029(2) -0.0056(19) -0.002(2) -0.029(2) 
C91 0.071(4) 0.045(3) 0.037(2) -0.004(2) -0.005(2) -0.032(3) 
C92 0.115(6) 0.055(4) 0.038(3) -0.006(2) -0.011(3) -0.056(4) 
C93 0.083(5) 0.076(4) 0.045(3) 0.000(3) -0.019(3) -0.054(4) 
C94 0.052(3) 0.062(4) 0.043(3) 0.000(2) -0.014(2) -0.036(3) 
C95 0.051(3) 0.045(3) 0.031(2) -0.0039(19) -0.003(2) -0.031(2) 
C96 0.039(3) 0.050(3) 0.036(2) 0.000(2) -0.0056(19) -0.026(2) 
C97 0.151(10) 0.153(10) 0.119(8) 0.001(7) -0.012(7) -0.084(8) 
 
_geom_special_details 
; 
 All esds (except the esd in the dihedral angle between two l.s. planes) 
 are estimated using the full covariance matrix.  The cell esds are taken 
 into account individually in the estimation of esds in distances, angles 
 and torsion angles; correlations between esds in cell parameters are only 
 used when they are defined by crystal symmetry.  An approximate (isotropic) 
 treatment of cell esds is used for estimating esds involving l.s. planes. 
; 
 
loop_ 
 _geom_bond_atom_site_label_1 
 _geom_bond_atom_site_label_2 
 _geom_bond_distance 
 _geom_bond_site_symmetry_2 
 _geom_bond_publ_flag 
Cl1 C97 1.669(10) . ? 
Cl2 C97 1.669(10) . ? 
Cl3 C97 1.650(11) . ? 
S1 C21 1.752(5) . ? 
S1 C10 1.823(5) . ? 
S2 C22 1.744(5) . ? 
S2 C20 1.820(5) . ? 
S3 C21 1.752(5) . ? 
S3 C23 1.763(5) . ? 
S4 C22 1.757(5) . ? 
S4 C23 1.763(4) . ? 
S5 C69 1.760(5) . ? 
S5 C71 1.773(4) . ? 
S6 C70 1.757(5) . ? 
S6 C71 1.771(5) . ? 
S7 C69 1.749(5) . ? 
S7 C58 1.821(5) . ? 
S8 C70 1.756(5) . ? 
S8 C68 1.818(5) . ? 
C1 C2 1.511(8) . ? 
C2 C3 1.524(7) . ? 
C3 C4 1.518(7) . ? 
C4 C5 1.533(7) . ? 
C5 C6 1.524(7) . ? 
C6 C7 1.526(7) . ? 
C7 C8 1.528(7) . ? 
C8 C9 1.519(6) . ? 
C9 C10 1.509(7) . ? 
C11 C12 1.492(9) . ? 
C12 C13 1.519(8) . ? 
C13 C14 1.524(7) . ? 
C14 C15 1.510(7) . ? 
C15 C16 1.521(7) . ? 
C16 C17 1.522(6) . ? 
C17 C18 1.524(7) . ? 
C18 C19 1.520(7) . ? 
C19 C20 1.517(7) . ? 
C21 C22 1.346(7) . ? 
C23 C24 1.361(6) . ? 
C24 C37 1.474(6) . ? 
C24 C25 1.482(6) . ? 
C25 C26 1.390(6) . ? 
C25 C30 1.411(5) . ? 
C26 C27 1.378(6) . ? 
C27 C28 1.384(6) . ? 
C28 C29 1.384(6) . ? 
C29 C30 1.404(6) . ? 
C30 C31 1.470(6) . ? 
C31 C38 1.374(6) . ? 
C31 C32 1.478(6) . ? 
C32 C33 1.402(6) . ? 
C32 C37 1.410(5) . ? 
C33 C34 1.373(6) . ? 
C34 C35 1.384(6) . ? 
C35 C36 1.392(6) . ? 
C36 C37 1.384(6) . ? 
C38 C40 1.431(6) . ? 
C38 C39 1.436(6) . ? 
C39 C48 1.201(6) 2_676 ? 
C40 C41 1.189(6) . ? 
C41 C42 1.439(6) . ? 
C42 C43 1.393(6) . ? 
C42 C47 1.410(6) . ? 
C43 C44 1.383(7) . ? 
C44 C45 1.388(7) . ? 
C45 C46 1.382(6) . ? 
C46 C47 1.394(6) . ? 
C47 C48 1.429(6) . ? 
C48 C39 1.201(6) 2_676 ? 
C49 C50 1.514(8) . ? 
C50 C51 1.511(6) . ? 
C51 C52 1.511(7) . ? 
C52 C53 1.528(6) . ? 
C53 C54 1.514(7) . ? 
C54 C55 1.523(6) . ? 
C55 C56 1.523(6) . ? 
C56 C57 1.518(6) . ? 
C57 C58 1.520(7) . ? 
C59 C60 1.527(7) . ? 
C60 C61 1.526(7) . ? 
C61 C62 1.504(7) . ? 
C62 C63 1.531(7) . ? 
C63 C64 1.520(6) . ? 
C64 C65 1.510(7) . ? 
C65 C66 1.508(7) . ? 
C66 C67 1.528(7) . ? 
C67 C68 1.505(7) . ? 
C69 C70 1.340(7) . ? 
C71 C72 1.346(6) . ? 
C72 C73 1.478(6) . ? 
C72 C85 1.479(6) . ? 
C73 C74 1.387(6) . ? 
C73 C78 1.422(6) . ? 
C74 C75 1.376(7) . ? 
C75 C76 1.387(7) . ? 
C76 C77 1.377(7) . ? 
C77 C78 1.390(6) . ? 
C78 C79 1.469(6) . ? 
C79 C86 1.379(6) . ? 
C79 C80 1.476(6) . ? 
C80 C81 1.386(6) . ? 
C80 C85 1.413(6) . ? 
C81 C82 1.366(7) . ? 
C82 C83 1.392(7) . ? 
C83 C84 1.380(7) . ? 
C84 C85 1.384(6) . ? 
C86 C88 1.427(6) . ? 
C86 C87 1.433(7) . ? 
C87 C96 1.191(6) 2_667 ? 
C88 C89 1.195(6) . ? 
C89 C90 1.428(7) . ? 
C90 C91 1.402(6) . ? 
C90 C95 1.407(7) . ? 
C91 C92 1.395(8) . ? 
C92 C93 1.374(9) . ? 
C93 C94 1.366(8) . ? 
C94 C95 1.400(6) . ? 
C95 C96 1.429(7) . ? 
C96 C87 1.191(6) 2_667 ? 
 
loop_ 
 _geom_angle_atom_site_label_1 
 _geom_angle_atom_site_label_2 
 _geom_angle_atom_site_label_3 
 _geom_angle 
 _geom_angle_site_symmetry_1 
 _geom_angle_site_symmetry_3 
 _geom_angle_publ_flag 
C21 S1 C10 100.8(2) . . ? 
C22 S2 C20 102.0(2) . . ? 
C21 S3 C23 97.0(2) . . ? 
C22 S4 C23 97.6(2) . . ? 
C69 S5 C71 96.9(2) . . ? 
C70 S6 C71 96.9(2) . . ? 
C69 S7 C58 103.7(2) . . ? 
C70 S8 C68 101.1(2) . . ? 
C1 C2 C3 113.1(5) . . ? 
C4 C3 C2 111.4(4) . . ? 
C3 C4 C5 115.2(4) . . ? 
C6 C5 C4 111.8(4) . . ? 
C5 C6 C7 113.8(4) . . ? 
C6 C7 C8 113.3(4) . . ? 
C9 C8 C7 112.8(4) . . ? 
C10 C9 C8 113.1(4) . . ? 
C9 C10 S1 113.9(4) . . ? 
C11 C12 C13 114.1(6) . . ? 
C12 C13 C14 113.9(5) . . ? 
C15 C14 C13 114.0(4) . . ? 
C14 C15 C16 114.0(4) . . ? 
C15 C16 C17 113.4(4) . . ? 
C16 C17 C18 114.5(4) . . ? 
C19 C18 C17 111.6(4) . . ? 
C20 C19 C18 113.8(4) . . ? 
C19 C20 S2 113.4(4) . . ? 
C22 C21 S1 126.1(4) . . ? 
C22 C21 S3 117.1(4) . . ? 
S1 C21 S3 116.4(3) . . ? 
C21 C22 S2 125.8(4) . . ? 
C21 C22 S4 115.7(3) . . ? 
S2 C22 S4 117.9(3) . . ? 
C24 C23 S4 124.9(4) . . ? 
C24 C23 S3 123.9(3) . . ? 
S4 C23 S3 111.0(2) . . ? 
C23 C24 C37 123.3(4) . . ? 
C23 C24 C25 121.6(4) . . ? 
C37 C24 C25 114.9(3) . . ? 
C26 C25 C30 118.8(4) . . ? 
C26 C25 C24 123.8(4) . . ? 
C30 C25 C24 117.3(4) . . ? 
C27 C26 C25 121.2(4) . . ? 
C26 C27 C28 120.5(4) . . ? 
C29 C28 C27 119.4(4) . . ? 
C28 C29 C30 120.9(4) . . ? 
C29 C30 C25 119.1(4) . . ? 
C29 C30 C31 122.4(4) . . ? 
C25 C30 C31 118.5(4) . . ? 
C38 C31 C30 122.0(4) . . ? 
C38 C31 C32 123.8(4) . . ? 
C30 C31 C32 113.8(4) . . ? 
C33 C32 C37 118.9(4) . . ? 
C33 C32 C31 122.9(4) . . ? 
C37 C32 C31 118.1(4) . . ? 
C34 C33 C32 121.3(4) . . ? 
C33 C34 C35 119.6(4) . . ? 
C34 C35 C36 120.1(4) . . ? 
C37 C36 C35 120.9(4) . . ? 
C36 C37 C32 119.1(4) . . ? 
C36 C37 C24 123.0(4) . . ? 
C32 C37 C24 117.9(4) . . ? 
C31 C38 C40 124.2(4) . . ? 
C31 C38 C39 121.6(4) . . ? 
C40 C38 C39 113.9(4) . . ? 
C48 C39 C38 177.0(5) 2_676 . ? 
C41 C40 C38 174.4(5) . . ? 
C40 C41 C42 175.2(5) . . ? 
C43 C42 C47 119.6(4) . . ? 
C43 C42 C41 119.3(4) . . ? 
C47 C42 C41 121.1(4) . . ? 
C44 C43 C42 121.0(4) . . ? 
C43 C44 C45 119.3(5) . . ? 
C46 C45 C44 120.5(4) . . ? 
C45 C46 C47 120.8(4) . . ? 
C46 C47 C42 118.7(4) . . ? 
C46 C47 C48 120.1(4) . . ? 
C42 C47 C48 121.2(4) . . ? 
C39 C48 C47 173.8(5) 2_676 . ? 
C51 C50 C49 113.0(5) . . ? 
C50 C51 C52 115.3(4) . . ? 
C51 C52 C53 113.4(4) . . ? 
C54 C53 C52 113.4(4) . . ? 
C53 C54 C55 113.7(4) . . ? 
C56 C55 C54 113.9(4) . . ? 
C57 C56 C55 113.6(4) . . ? 
C56 C57 C58 111.9(4) . . ? 
C57 C58 S7 114.8(3) . . ? 
C61 C60 C59 112.9(5) . . ? 
C62 C61 C60 113.6(4) . . ? 
C61 C62 C63 113.7(4) . . ? 
C64 C63 C62 114.1(4) . . ? 
C65 C64 C63 114.0(4) . . ? 
C66 C65 C64 114.2(4) . . ? 
C65 C66 C67 112.1(4) . . ? 
C68 C67 C66 114.6(4) . . ? 
C67 C68 S8 112.4(4) . . ? 
C70 C69 S7 124.9(4) . . ? 
C70 C69 S5 116.6(4) . . ? 
S7 C69 S5 118.0(3) . . ? 
C69 C70 S8 126.9(4) . . ? 
C69 C70 S6 116.8(4) . . ? 
S8 C70 S6 116.2(3) . . ? 
C72 C71 S6 123.8(4) . . ? 
C72 C71 S5 125.3(4) . . ? 
S6 C71 S5 110.9(2) . . ? 
C71 C72 C73 123.1(4) . . ? 
C71 C72 C85 122.8(4) . . ? 
C73 C72 C85 113.8(4) . . ? 
C74 C73 C78 119.0(4) . . ? 
C74 C73 C72 123.8(4) . . ? 
C78 C73 C72 117.1(4) . . ? 
C75 C74 C73 120.8(4) . . ? 
C74 C75 C76 120.8(5) . . ? 
C77 C76 C75 119.1(5) . . ? 
C76 C77 C78 121.6(5) . . ? 
C77 C78 C73 118.7(4) . . ? 
C77 C78 C79 123.3(4) . . ? 
C73 C78 C79 118.0(4) . . ? 
C86 C79 C78 123.3(4) . . ? 
C86 C79 C80 122.3(4) . . ? 
C78 C79 C80 114.3(4) . . ? 
C81 C80 C85 118.9(4) . . ? 
C81 C80 C79 123.5(4) . . ? 
C85 C80 C79 117.5(4) . . ? 
C82 C81 C80 121.6(5) . . ? 
C81 C82 C83 119.5(5) . . ? 
C84 C83 C82 120.0(5) . . ? 
C83 C84 C85 120.9(5) . . ? 
C84 C85 C80 119.0(4) . . ? 
C84 C85 C72 123.1(4) . . ? 
C80 C85 C72 117.9(4) . . ? 
C79 C86 C88 122.5(4) . . ? 
C79 C86 C87 122.3(4) . . ? 
C88 C86 C87 115.0(4) . . ? 
C96 C87 C86 177.2(5) 2_667 . ? 
C89 C88 C86 177.3(5) . . ? 
C88 C89 C90 176.7(5) . . ? 
C91 C90 C95 119.2(5) . . ? 
C91 C90 C89 120.3(5) . . ? 
C95 C90 C89 120.5(4) . . ? 
C92 C91 C90 119.6(5) . . ? 
C93 C92 C91 120.8(5) . . ? 
C94 C93 C92 120.0(5) . . ? 
C93 C94 C95 121.2(5) . . ? 
C94 C95 C90 119.1(5) . . ? 
C94 C95 C96 119.6(5) . . ? 
C90 C95 C96 121.4(4) . . ? 
C87 C96 C95 176.8(5) 2_667 . ? 
Cl3 C97 Cl2 114.2(7) . . ? 
Cl3 C97 Cl1 118.5(7) . . ? 
Cl2 C97 Cl1 112.5(7) . . ? 
 
_diffrn_measured_fraction_theta_max    0.990 
_diffrn_reflns_theta_full              26.50 
_diffrn_measured_fraction_theta_full   0.990 
_refine_diff_density_max    0.877 
_refine_diff_density_min   -0.879 
_refine_diff_density_rms    0.070 
